# Supplementary material for: Evaluation of Dittrichia viscosa Aquaporin Nip1.1 Gene as Marker for Arsenic-Tolerant Plant Selection
Source: MDPI journal article supplement (doi:10.3390/plants11151968), 2022-07-28
Supplement: s1 [file s1]

## Supplementary Material

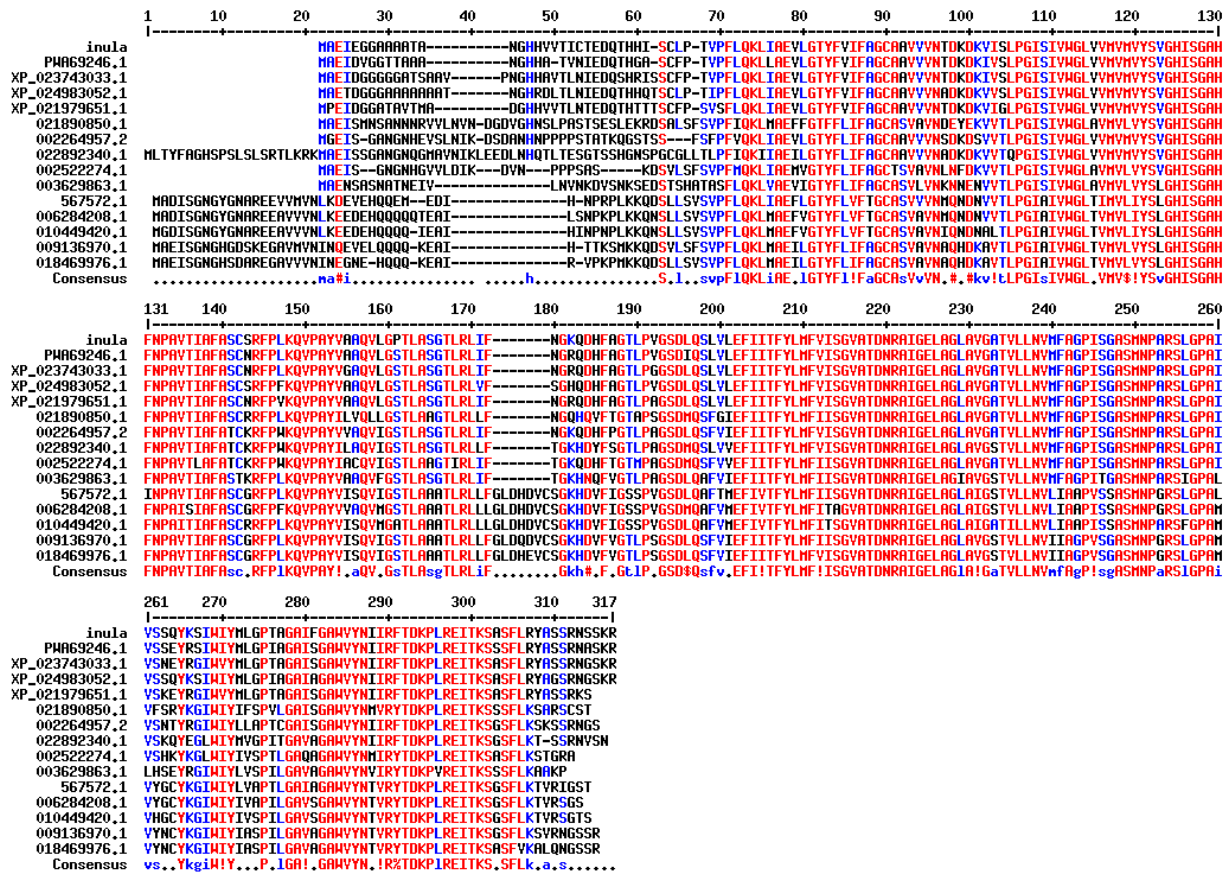

**Supplemental figure s1:** Alignment of the predicted amino acid sequence of DvNip1 with members of Arabidopsis and other Nip. Putative *Dittrichia viscosa* DvNip1 amino acid sequence were aligned using MultiAlign. The identical residues are shaded in red. >inula nip [*Dittrichia viscosa*]; >PWA69246.1 NOD26-like intrinsic protein 1,2 [*Artemisia annua*]; >XP\_023743033.1 aquaporin NIP1-2-like [*Lactuca sativa*]; >XP\_024983052.1 aquaporin NIP1-1-like [*Cynara cardunculus* var. *scolymus*]; >XP\_021979651.1 aquaporin NIP1-1-like [*Helianthus annuus*]; >567572.1 NOD26-like major intrinsic protein 1 [*Arabidopsis thaliana*]; >006284208.1 aquaporin NIP1-1 [*Capsella rubella*]; >010449420.1 PREDICTED: aquaporin NIP1-1 isoform X1 [*Camelina sativa*]; >009136970.1 PREDICTED: aquaporin NIP1-2 [*Brassica rapa*]; >018469976.1 PREDICTED: aquaporin NIP1-2 [*Raphanus sativus*]; >021890850.1 aquaporin NIP1-2 [*Carica papaya*]; >002522274.1 PREDICTED: aquaporin NIP1-2 isoform X1 [*Ricinus communis*]; >002264957.2 PREDICTED: aquaporin NIP1-1 [*Vitis vinifera*]; >003629863.1 nodulin-26 isoform X1 [*Medicago truncatula*]; >022892340.1 aquaporin NIP1-1-like isoform X1 [*Olea europaea* var. *syvestris*].

## Supplementary Material

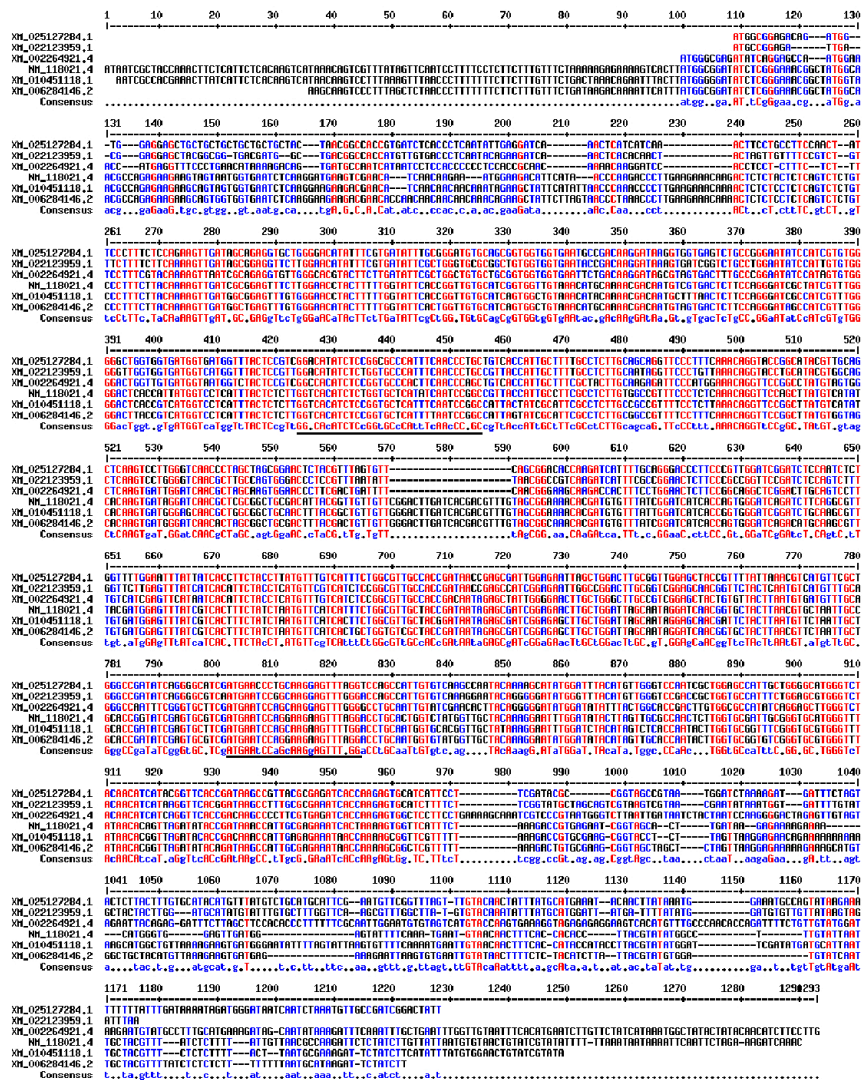

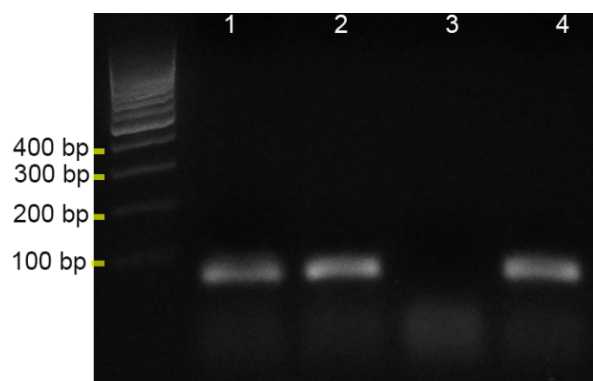

**Supplemental Figure s3.** Conventional PCR products amplified with each pair of primers revealed a single product of the expected size. Obtained amplimers with AtEF1-A (1), AtAct2 (2), AtAct8 (3) and NtEF1-A (4) primer pairs, visualized on 2.0% agarose gel.

Descriptions

Graphic Summary

Alignments

Taxonomy

Sequences producing significant alignments

DownloadSelect columnsShow100

☒ select all

100 sequences selected

GenPept

Graphics

Distance tree of results

Multiple alignment

MSA Viewer

|                                     | Description                                                                                  | Scientific Name                       | Max Score | Total Score | Query Cover | E value | Per. Ident | Acc. Len | Accession                      |
|-------------------------------------|----------------------------------------------------------------------------------------------|---------------------------------------|-----------|-------------|-------------|---------|------------|----------|--------------------------------|
| <input checked="" type="checkbox"/> | <a href="#">elongation factor 1-alpha [Helianthus annuus]</a>                                | <a href="#">Helianthus annuus</a>     | 64.7      | 64.7        | 100%        | 1e-13   | 100.00%    | 449      | <a href="#">XP_021981523.1</a> |
| <input checked="" type="checkbox"/> | <a href="#">elongation factor 1-alpha-like [Cynara cardunculus var. scolymus]</a>            | <a href="#">Cynara cardunculus...</a> | 64.7      | 64.7        | 100%        | 1e-13   | 100.00%    | 449      | <a href="#">XP_024976594.1</a> |
| <input checked="" type="checkbox"/> | <a href="#">elongation factor 1-alpha [Artemisia annua]</a>                                  | <a href="#">Artemisia annua</a>       | 64.7      | 64.7        | 100%        | 1e-13   | 100.00%    | 449      | <a href="#">PWA49076.1</a>     |
| <input checked="" type="checkbox"/> | <a href="#">elongation factor 1-alpha [Helianthus annuus]</a>                                | <a href="#">Helianthus annuus</a>     | 64.7      | 64.7        | 100%        | 1e-13   | 100.00%    | 449      | <a href="#">XP_021973407.1</a> |
| <input checked="" type="checkbox"/> | <a href="#">elongation factor 1-alpha-like isoform X1 [Cynara cardunculus var. scolymus]</a> | <a href="#">Cynara cardunculus...</a> | 64.7      | 64.7        | 100%        | 1e-13   | 100.00%    | 449      | <a href="#">XP_024970426.1</a> |
| <input checked="" type="checkbox"/> | <a href="#">elongation factor 1-alpha isoform X1 [Lactuca sativa]</a>                        | <a href="#">Lactuca sativa</a>        | 64.7      | 64.7        | 100%        | 1e-13   | 100.00%    | 449      | <a href="#">XP_023747111.1</a> |
| <input checked="" type="checkbox"/> | <a href="#">elongation factor 1-alpha-like [Lactuca sativa]</a>                              | <a href="#">Lactuca sativa</a>        | 64.7      | 64.7        | 100%        | 1e-13   | 100.00%    | 447      | <a href="#">XP_042755374.1</a> |
| <input checked="" type="checkbox"/> | <a href="#">hypothetical protein CT112_AA312610 [Artemisia annua]</a>                        | <a href="#">Artemisia annua</a>       | 64.7      | 64.7        | 100%        | 1e-13   | 100.00%    | 447      | <a href="#">PWA65970.1</a>     |
| <input checked="" type="checkbox"/> | <a href="#">elongation factor 1-alpha [Cynara cardunculus var. scolymus]</a>                 | <a href="#">Cynara cardunculus...</a> | 64.7      | 64.7        | 100%        | 1e-13   | 100.00%    | 447      | <a href="#">XP_024983118.1</a> |
| <input checked="" type="checkbox"/> | <a href="#">hypothetical protein CT112_AA312610 [Artemisia annua]</a>                        | <a href="#">Artemisia annua</a>       | 64.7      | 64.7        | 100%        | 1e-13   | 100.00%    | 447      | <a href="#">PWA65971.1</a>     |
| <input checked="" type="checkbox"/> | <a href="#">elongation factor 1-alpha 1 [Cynara cardunculus var. scolymus]</a>               | <a href="#">Cynara cardunculus...</a> | 64.7      | 64.7        | 100%        | 1e-13   | 100.00%    | 447      | <a href="#">XP_024985721.1</a> |
| <input checked="" type="checkbox"/> | <a href="#">elongation factor 1-alpha-like [Cynara cardunculus var. scolymus]</a>            | <a href="#">Cynara cardunculus...</a> | 64.7      | 64.7        | 100%        | 1e-13   | 100.00%    | 447      | <a href="#">XP_024968429.1</a> |
| <input checked="" type="checkbox"/> | <a href="#">hypothetical protein CT112_AA400390 [Artemisia annua]</a>                        | <a href="#">Artemisia annua</a>       | 64.7      | 64.7        | 100%        | 1e-13   | 100.00%    | 447      | <a href="#">PWA58403.1</a>     |
| <input checked="" type="checkbox"/> | <a href="#">elongation factor 1-alpha [Artemisia annua]</a>                                  | <a href="#">Artemisia annua</a>       | 64.7      | 64.7        | 100%        | 1e-13   | 100.00%    | 447      | <a href="#">PWA48367.1</a>     |
| <input checked="" type="checkbox"/> | <a href="#">elongation factor 1-alpha [Helianthus annuus]</a>                                | <a href="#">Helianthus annuus</a>     | 64.7      | 64.7        | 100%        | 1e-13   | 100.00%    | 447      | <a href="#">XP_022006019.1</a> |
| <input checked="" type="checkbox"/> | <a href="#">hypothetical protein Ccd_021776 [Cynara cardunculus var. scolymus]</a>           | <a href="#">Cynara cardunculus...</a> | 64.7      | 64.7        | 100%        | 1e-13   | 100.00%    | 437      | <a href="#">KVI00009.1</a>     |
| <input checked="" type="checkbox"/> | <a href="#">hypothetical protein Ccd_012208 [Cynara cardunculus var. scolymus]</a>           | <a href="#">Cynara cardunculus...</a> | 64.7      | 64.7        | 100%        | 1e-13   | 100.00%    | 389      | <a href="#">KVI09405.1</a>     |
| <input checked="" type="checkbox"/> | <a href="#">elongation factor 1-alpha isoform X2 [Lactuca sativa]</a>                        | <a href="#">Lactuca sativa</a>        | 64.7      | 64.7        | 100%        | 1e-13   | 100.00%    | 380      | <a href="#">XP_042754064.1</a> |

Download

GenPept

Graphics

elongation factor 1-alpha [Helianthus annuus]

Sequence ID: [XP\\_021981523.1](#) Length: 449 Number of Matches: 1

[See 2 more title\(s\)](#) [See all Identical Proteins\(IPG\)](#)

Range 1: 226 to 244

GenPept

Graphics

Next Match

Previous Match

| Score          | Expect | Identities  | Positives   | Gaps     |
|----------------|--------|-------------|-------------|----------|
| 64.7 bits(145) | 1e-13  | 19/19(100%) | 19/19(100%) | 0/19(0%) |

|       |     |                     |     |
|-------|-----|---------------------|-----|
| Query | 1   | PKRPSDKPLRLPLQDVYKI | 19  |
|       |     | PKRPSDKPLRLPLQDVYKI |     |
| Sbjct | 226 | PKRPSDKPLRLPLQDVYKI | 244 |

**Supplemental Figure s4.** BLAST-P analysis results performed with the aminoacid sequence deduced from amplification product obtained with AtEF1-A primer pairs.

|                   | <b>AtAct2</b> |                 |            |                   | <b>AtEF1-A</b> |                 |            |                   | <b>NtEF1-A</b> |                 |            |                   |
|-------------------|---------------|-----------------|------------|-------------------|----------------|-----------------|------------|-------------------|----------------|-----------------|------------|-------------------|
| Sample            | Ct value      | Experiment mean | SD         | CV                | Ct Value       | Experiment mean | SD         | CV                | Ct Value       | Experiment mean | SD         | CV                |
| Shoot CTRL1       | 30,34         | 30,4866667      | 0,57422411 | <b>0,05053975</b> | 23,79          | 23,09           | 0,63624793 | <b>0,02676146</b> | 35,6           | 34,76           | 0,73430239 | <b>0,02419668</b> |
| Shoot CTRL2       | 30            |                 |            |                   | 23,19          |                 |            |                   | 34,44          |                 |            |                   |
| Shoot CTRL3       | 31,12         |                 |            |                   | 22,29          |                 |            |                   | 34,24          |                 |            |                   |
| Shoot AsIII(6h)1  | 32,55         | 30,6366667      | 1,68953643 |                   | 23,89          | 23,2333333      | 0,63610796 |                   | 34,33          | 34,53           | 0,71140706 |                   |
| Shoot AsIII(6h)2  | 30,01         |                 |            |                   | 23,19          |                 |            |                   | 35,32          |                 |            |                   |
| Shoot AsIII(6h)3  | 29,35         |                 |            |                   | 22,62          |                 |            |                   | 33,94          |                 |            |                   |
| Shoot AsIII(48h)1 | 26,16         | 27,6            | 1,29799846 |                   | 22,62          | 23,2133333      | 0,61614392 |                   | 33,74          | 33,9133333      | 0,52204725 |                   |
| Shoot AsIII(48h)2 | 27,96         |                 |            |                   | 23,17          |                 |            |                   | 33,5           |                 |            |                   |
| Shoot AsIII(48h)3 | 28,68         |                 |            |                   | 23,85          |                 |            |                   | 34,5           |                 |            |                   |
| Shoot AsV(6h)1    | 30,54         | 29,3066667      | 1,06884673 |                   | 22,79          | 23,6666667      | 0,94044316 |                   | 34,89          | 34,8833333      | 1,38001208 |                   |
| Shoot AsV(6h)2    | 28,65         |                 |            |                   | 23,55          |                 |            |                   | 36,26          |                 |            |                   |
| Shoot AsV(6h)3    | 28,73         |                 |            |                   | 24,66          |                 |            |                   | 33,5           |                 |            |                   |
| Shoot CdII(6h)1   | 30,1          | 29,5933333      | 0,83464563 |                   | 23,03          | 22,9166667      | 0,36350149 |                   | 33,72          | 34,1533333      | 0,93831409 |                   |
| Shoot CdII(6h)2   | 28,63         |                 |            |                   | 22,51          |                 |            |                   | 33,51          |                 |            |                   |
| Shoot CdII(6h)3   | 30,05         |                 |            |                   | 23,21          |                 |            |                   | 35,23          |                 |            |                   |
| Root CTRL1        | 33,61         | 32,2733333      | 1,23313962 | <b>0,04484553</b> | 25,535         | 25,6616667      | 0,15892871 | <b>0,03929649</b> | 34,18          | 35,2266667      | 1,09258104 | <b>0,03391399</b> |
| Root CTRL2        | 32,03         |                 |            |                   | 25,61          |                 |            |                   | 35,14          |                 |            |                   |
| Root CTRL3        | 31,18         |                 |            |                   | 25,84          |                 |            |                   | 36,36          |                 |            |                   |
| Root AsIII(6h)1   | 30,27         | 29,61           | 0,77948701 |                   | 25,8           | 25,4666667      | 0,28884829 |                   | 35,23          | 34,9266667      | 0,65957057 |                   |
| Root AsIII(6h)2   | 29,81         |                 |            |                   | 25,31          |                 |            |                   | 35,38          |                 |            |                   |
| Root AsIII(6h)3   | 28,75         |                 |            |                   | 25,29          |                 |            |                   | 34,17          |                 |            |                   |
| Root AsIII(48h)1  | 30,21         | 30,3533333      | 1,4503218  |                   | 26,57          | 25,8866667      | 0,78449559 |                   | 35,21          | 34,3066667      | 0,8292366  |                   |
| Root AsIII(48h)2  | 31,87         |                 |            |                   | 26,06          |                 |            |                   | 33,58          |                 |            |                   |
| Root AsIII(48h)3  | 28,98         |                 |            |                   | 25,03          |                 |            |                   | 34,13          |                 |            |                   |
| Root AsV(6h)1     | 31,78         | 31,73           | 0,836122   |                   | 23,1           | 23,9033333      | 0,74096784 |                   | 35,85          | 33,9033333      | 1,7350024  |                   |
| Root AsV(6h)2     | 32,54         |                 |            |                   | 24,05          |                 |            |                   | 32,52          |                 |            |                   |
| Root AsV(6h)3     | 30,87         |                 |            |                   | 24,56          |                 |            |                   | 33,34          |                 |            |                   |
| Root CdII(6h)1    | 32,56         | 32,2633333      | 0,34151623 |                   | 24,32          | 24,02           | 0,26457513 |                   | 34,42          | 33,6566667      | 1,24500335 |                   |
| Root CdII(6h)2    | 31,89         |                 |            |                   | 23,92          |                 |            |                   | 32,22          |                 |            |                   |
| Root CdII(6h)3    | 32,34         |                 |            |                   | 23,82          |                 |            |                   | 34,33          |                 |            |                   |

**Table S1.** Validation of reference genes in *D. viscosa*. Raw Ct values of the three amplification products given by the primer pairs used to identify the reference genes for *Dittrichia* in all experimental condition and samples (shoots and roots). Means  $\pm$  SD of single independent experiments and Coefficient of Variation (CV) are reported.
